# Supplementary material for: A Differential Effect of Lovastatin versus Simvastatin in Neurodevelopmental Disorders
Source: eNeuro. 2020 Jul 28;7(4):ENEURO.0162-20.2020. doi: 10.1523/ENEURO.0162-20.2020 (PMC7433894; doi:10.1523/ENEURO.0162-20.2020)
Supplement: Extended Data Figure 1-3 — Combined dataset from Muscas et al. (2019) and four datasets from Osterweil et al. (2013). Download Figure 1-3, XLS file. [file enu-eN-COM-0162-20-s04.xls]

## Sheet: Figure 1-3
genotype	treatment	severity	incidence	figure_sev	figure_inc
WT	veh	no	no	3c	3b
WT	veh	no	no	3c	3b
WT	veh	no	no	3c	3b
WT	veh	no	no	3c	3b
WT	veh	no	no	3c	3b
WT	veh	no	no	3c	3b
WT	veh	no	no	3c	3b
WT	veh	no	no	3c	3b
WT	veh	no	no	3c	3b
WT	veh	no	no	3c	3b
WT	veh	no	no	3c	3b
WT	veh	tonic	yes	3c	3b
WT	simvlow	no	no	NA	3b
WT	simvlow	no	no	NA	3b
WT	simvlow	no	no	NA	3b
WT	simvlow	no	no	NA	3b
WT	simvlow	no	no	NA	3b
WT	simvlow	no	no	NA	3b
WT	simvlow	no	no	NA	3b
WT	simvlow	no	no	NA	3b
WT	simvlow	no	no	NA	3b
WT	simvlow	no	no	NA	3b
WT	simvlow	no	no	NA	3b
WT	simvlow	tonic	yes	NA	3b
KO	veh	no	no	3c	3b
KO	veh	no	no	3c	3b
KO	veh	no	no	3c	3b
KO	veh	run	yes	3c	3b
KO	veh	clonic	yes	3c	3b
KO	veh	clonic	yes	3c	3b
KO	veh	clonic	yes	3c	3b
KO	veh	clonic	yes	3c	3b
KO	veh	clonic	yes	3c	3b
KO	veh	tonic	yes	3c	3b
KO	veh	tonic	yes	3c	3b
KO	veh	tonic	yes	3c	3b
KO	simvlow	no	no	3c	3b
KO	simvlow	no	no	3c	3b
KO	simvlow	no	no	3c	3b
KO	simvlow	run	yes	3c	3b
KO	simvlow	run	yes	3c	3b
KO	simvlow	run	yes	3c	3b
KO	simvlow	clonic	yes	3c	3b
KO	simvlow	clonic	yes	3c	3b
KO	simvlow	tonic	yes	3c	3b
KO	simvlow	tonic	yes	3c	3b
KO	simvlow	tonic	yes	3c	3b
KO	simvlow	tonic	yes	3c	3b
WT	veh	no	no	3f	3e
WT	veh	no	no	3f	3e
WT	veh	no	no	3f	3e
WT	veh	no	no	3f	3e
WT	veh	no	no	3f	3e
WT	veh	no	no	3f	3e
WT	veh	no	no	3f	3e
WT	veh	no	no	3f	3e
WT	veh	no	no	3f	3e
WT	veh	no	no	3f	3e
WT	veh	no	no	3f	3e
WT	veh	tonic	yes	3f	3e
WT	simvhigh	no	no	NA	3e
WT	simvhigh	no	no	NA	3e
WT	simvhigh	no	no	NA	3e
WT	simvhigh	no	no	NA	3e
WT	simvhigh	no	no	NA	3e
WT	simvhigh	no	no	NA	3e
WT	simvhigh	no	no	NA	3e
WT	simvhigh	no	no	NA	3e
WT	simvhigh	no	no	NA	3e
WT	simvhigh	no	no	NA	3e
WT	simvhigh	no	no	NA	3e
WT	simvhigh	no	no	NA	3e
WT	simvhigh	tonic	yes	NA	3e
KO	veh	no	no	3f	3e
KO	veh	no	no	3f	3e
KO	veh	no	no	3f	3e
KO	veh	no	no	3f	3e
KO	veh	no	no	3f	3e
KO	veh	clonic	yes	3f	3e
KO	veh	tonic	yes	3f	3e
KO	veh	tonic	yes	3f	3e
KO	veh	tonic	yes	3f	3e
KO	veh	tonic	yes	3f	3e
KO	veh	tonic	yes	3f	3e
KO	veh	tonic	yes	3f	3e
KO	veh	tonic	yes	3f	3e
KO	veh	tonic	yes	3f	3e
KO	simvhigh	no	no	3f	3e
KO	simvhigh	no	no	3f	3e
KO	simvhigh	no	no	3f	3e
KO	simvhigh	no	no	3f	3e
KO	simvhigh	no	no	3f	3e
KO	simvhigh	clonic	yes	3f	3e
KO	simvhigh	clonic	yes	3f	3e
KO	simvhigh	clonic	yes	3f	3e
KO	simvhigh	tonic	yes	3f	3e
KO	simvhigh	tonic	yes	3f	3e
KO	simvhigh	tonic	yes	3f	3e
WT	veh	no	no	3i	3h
WT	veh	no	no	3i	3h
WT	veh	no	no	3i	3h
WT	veh	no	no	3i	3h
WT	veh	no	no	3i	3h
WT	veh	no	no	3i	3h
WT	veh	no	no	3i	3h
WT	veh	no	no	3i	3h
WT	veh	no	no	3i	3h
WT	veh	no	no	3i	3h
WT	veh	no	no	3i	3h
WT	veh	no	no	3i	3h
WT	veh	no	no	3i	3h
WT	veh	tonic	yes	3i	3h
WT	veh	tonic	yes	3i	3h
WT	lova	no	no	NA	3h
WT	lova	no	no	NA	3h
WT	lova	no	no	NA	3h
WT	lova	no	no	NA	3h
WT	lova	no	no	NA	3h
WT	lova	no	no	NA	3h
WT	lova	no	no	NA	3h
WT	lova	no	no	NA	3h
WT	lova	no	no	NA	3h
WT	lova	no	no	NA	3h
WT	lova	no	no	NA	3h
WT	lova	no	no	NA	3h
WT	lova	no	no	NA	3h
WT	lova	no	no	NA	3h
WT	lova	no	no	NA	3h
WT	lova	run	yes	NA	3h
WT	lova	run	yes	NA	3h
KO	veh	no	no	3i	3h
KO	veh	no	no	3i	3h
KO	veh	no	no	3i	3h
KO	veh	no	no	3i	3h
KO	veh	no	no	3i	3h
KO	veh	clonic	yes	3i	3h
KO	veh	clonic	yes	3i	3h
KO	veh	clonic	yes	3i	3h
KO	veh	clonic	yes	3i	3h
KO	veh	clonic	yes	3i	3h
KO	veh	tonic	yes	3i	3h
KO	veh	tonic	yes	3i	3h
KO	veh	tonic	yes	3i	3h
KO	veh	tonic	yes	3i	3h
KO	veh	tonic	yes	3i	3h
KO	veh	tonic	yes	3i	3h
KO	lova	no	no	3i	3h
KO	lova	no	no	3i	3h
KO	lova	no	no	3i	3h
KO	lova	no	no	3i	3h
KO	lova	no	no	3i	3h
KO	lova	no	no	3i	3h
KO	lova	no	no	3i	3h
KO	lova	no	no	3i	3h
KO	lova	no	no	3i	3h
KO	lova	no	no	3i	3h
KO	lova	no	no	3i	3h
KO	lova	clonic	yes	3i	3h
KO	lova	tonic	yes	3i	3h
KO	lova	tonic	yes	3i	3h
WT	veh	no	no	NA	NA
WT	veh	no	no	NA	NA
WT	veh	no	no	NA	NA
WT	veh	no	no	NA	NA
WT	veh	no	no	NA	NA
WT	veh	no	no	NA	NA
WT	veh	no	no	NA	NA
WT	veh	no	no	NA	NA
WT	veh	no	no	NA	NA
WT	veh	no	no	NA	NA
WT	veh	run	yes	NA	NA
WT	veh	run	yes	NA	NA
WT	veh	tonic	yes	NA	NA
WT	veh	tonic	yes	NA	NA
WT	veh	tonic	yes	NA	NA
WT	lov100	no	no	NA	NA
WT	lov100	no	no	NA	NA
WT	lov100	no	no	NA	NA
WT	lov100	no	no	NA	NA
WT	lov100	no	no	NA	NA
WT	lov100	no	no	NA	NA
WT	lov100	no	no	NA	NA
WT	lov100	no	no	NA	NA
WT	lov100	no	no	NA	NA
WT	lov100	no	no	NA	NA
WT	lov100	no	no	NA	NA
WT	lov100	no	no	NA	NA
KO	veh	no	no	NA	NA
KO	veh	no	no	NA	NA
KO	veh	clonic	yes	NA	NA
KO	veh	clonic	yes	NA	NA
KO	veh	clonic	yes	NA	NA
KO	veh	tonic	yes	NA	NA
KO	veh	tonic	yes	NA	NA
KO	veh	tonic	yes	NA	NA
KO	veh	tonic	yes	NA	NA
KO	veh	tonic	yes	NA	NA
KO	veh	tonic	yes	NA	NA
KO	lov100	no	no	NA	NA
KO	lov100	no	no	NA	NA
KO	lov100	no	no	NA	NA
KO	lov100	no	no	NA	NA
KO	lov100	no	no	NA	NA
KO	lov100	no	no	NA	NA
KO	lov100	no	no	NA	NA
KO	lov100	no	no	NA	NA
KO	lov100	no	no	NA	NA
KO	lov100	no	no	NA	NA
KO	lov100	no	no	NA	NA
KO	lov100	clonic	yes	NA	NA
KO	lov100	clonic	yes	NA	NA
KO	lov100	tonic	yes	NA	NA
WT	veh	no	no	NA	NA
WT	veh	no	no	NA	NA
WT	veh	no	no	NA	NA
WT	veh	no	no	NA	NA
WT	veh	no	no	NA	NA
WT	veh	no	no	NA	NA
WT	veh	no	no	NA	NA
WT	veh	no	no	NA	NA
WT	veh	no	no	NA	NA
WT	veh	no	no	NA	NA
WT	lov30c	no	no	NA	NA
WT	lov30c	no	no	NA	NA
WT	lov30c	no	no	NA	NA
WT	lov30c	no	no	NA	NA
WT	lov30c	no	no	NA	NA
WT	lov30c	no	no	NA	NA
WT	lov30c	no	no	NA	NA
WT	lov30c	no	no	NA	NA
WT	lov30c	no	no	NA	NA
WT	lov30c	no	no	NA	NA
WT	lov30c	clonic	yes	NA	NA
KO	veh	no	no	NA	NA
KO	veh	no	no	NA	NA
KO	veh	no	no	NA	NA
KO	veh	no	no	NA	NA
KO	veh	no	no	NA	NA
KO	veh	run	yes	NA	NA
KO	veh	run	yes	NA	NA
KO	veh	run	yes	NA	NA
KO	veh	run	yes	NA	NA
KO	veh	run	yes	NA	NA
KO	veh	run	yes	NA	NA
KO	veh	run	yes	NA	NA
KO	veh	tonic	yes	NA	NA
KO	veh	tonic	yes	NA	NA
KO	veh	tonic	yes	NA	NA
KO	veh	tonic	yes	NA	NA
KO	veh	tonic	yes	NA	NA
KO	veh	tonic	yes	NA	NA
KO	veh	tonic	yes	NA	NA
KO	lov30c	no	no	NA	NA
KO	lov30c	no	no	NA	NA
KO	lov30c	no	no	NA	NA
KO	lov30c	no	no	NA	NA
KO	lov30c	no	no	NA	NA
KO	lov30c	no	no	NA	NA
KO	lov30c	no	no	NA	NA
KO	lov30c	no	no	NA	NA
KO	lov30c	no	no	NA	NA
KO	lov30c	no	no	NA	NA
KO	lov30c	no	no	NA	NA
KO	lov30c	no	no	NA	NA
KO	lov30c	no	no	NA	NA
KO	lov30c	run	yes	NA	NA
KO	lov30c	tonic	yes	NA	NA
KO	lov30c	tonic	yes	NA	NA
KO	lov30c	tonic	yes	NA	NA
KO	lov30c	tonic	yes	NA	NA
WT	veh	no	no	NA	NA
WT	veh	no	no	NA	NA
WT	veh	no	no	NA	NA
WT	veh	no	no	NA	NA
WT	veh	no	no	NA	NA
WT	veh	no	no	NA	NA
WT	veh	no	no	NA	NA
WT	veh	no	no	NA	NA
WT	veh	tonic	yes	NA	NA
WT	veh	tonic	yes	NA	NA
WT	veh	tonic	yes	NA	NA
WT	lov100c	no	no	NA	NA
WT	lov100c	no	no	NA	NA
WT	lov100c	no	no	NA	NA
WT	lov100c	no	no	NA	NA
WT	lov100c	no	no	NA	NA
WT	lov100c	no	no	NA	NA
WT	lov100c	no	no	NA	NA
WT	lov100c	no	no	NA	NA
WT	lov100c	no	no	NA	NA
WT	lov100c	run	yes	NA	NA
KO	veh	no	no	NA	NA
KO	veh	no	no	NA	NA
KO	veh	run	yes	NA	NA
KO	veh	run	yes	NA	NA
KO	veh	run	yes	NA	NA
KO	veh	clonic	yes	NA	NA
KO	veh	clonic	yes	NA	NA
KO	veh	tonic	yes	NA	NA
KO	veh	tonic	yes	NA	NA
KO	veh	tonic	yes	NA	NA
KO	veh	tonic	yes	NA	NA
KO	veh	tonic	yes	NA	NA
KO	veh	tonic	yes	NA	NA
KO	lov100c	no	no	NA	NA
KO	lov100c	no	no	NA	NA
KO	lov100c	no	no	NA	NA
KO	lov100c	no	no	NA	NA
KO	lov100c	no	no	NA	NA
KO	lov100c	no	no	NA	NA
KO	lov100c	no	no	NA	NA
KO	lov100c	no	no	NA	NA
KO	lov100c	no	no	NA	NA
KO	lov100c	no	no	NA	NA
KO	lov100c	run	yes	NA	NA
KO	lov100c	tonic	yes	NA	NA
KO	lov100c	tonic	yes	NA	NA
WT	veh	no	no	NA	NA
WT	veh	no	no	NA	NA
WT	veh	no	no	NA	NA
WT	veh	no	no	NA	NA
WT	veh	no	no	NA	NA
WT	veh	no	no	NA	NA
WT	veh	no	no	NA	NA
WT	veh	no	no	NA	NA
WT	veh	no	no	NA	NA
WT	veh	no	no	NA	NA
WT	veh	tonic	yes	NA	NA
WT	lov10c	no	no	NA	NA
WT	lov10c	no	no	NA	NA
WT	lov10c	no	no	NA	NA
WT	lov10c	no	no	NA	NA
WT	lov10c	no	no	NA	NA
WT	lov10c	no	no	NA	NA
WT	lov10c	no	no	NA	NA
WT	lov10c	no	no	NA	NA
WT	lov10c	no	no	NA	NA
WT	lov10c	no	no	NA	NA
WT	lov10c	no	no	NA	NA
WT	lov10c	no	no	NA	NA
WT	lov10c	no	no	NA	NA
WT	lov10c	no	no	NA	NA
WT	lov10c	no	no	NA	NA
KO	veh	no	no	NA	NA
KO	veh	no	no	NA	NA
KO	veh	no	no	NA	NA
KO	veh	no	no	NA	NA
KO	veh	no	no	NA	NA
KO	veh	no	no	NA	NA
KO	veh	run	yes	NA	NA
KO	veh	run	yes	NA	NA
KO	veh	run	yes	NA	NA
KO	veh	run	yes	NA	NA
KO	veh	run	yes	NA	NA
KO	veh	run	yes	NA	NA
KO	veh	run	yes	NA	NA
KO	veh	run	yes	NA	NA
KO	veh	tonic	yes	NA	NA
KO	veh	tonic	yes	NA	NA
KO	veh	tonic	yes	NA	NA
KO	veh	tonic	yes	NA	NA
KO	veh	tonic	yes	NA	NA
KO	veh	tonic	yes	NA	NA
KO	veh	tonic	yes	NA	NA
KO	lov10c	no	no	NA	NA
KO	lov10c	no	no	NA	NA
KO	lov10c	no	no	NA	NA
KO	lov10c	no	no	NA	NA
KO	lov10c	no	no	NA	NA
KO	lov10c	no	no	NA	NA
KO	lov10c	no	no	NA	NA
KO	lov10c	no	no	NA	NA
KO	lov10c	no	no	NA	NA
KO	lov10c	no	no	NA	NA
KO	lov10c	no	no	NA	NA
KO	lov10c	no	no	NA	NA
KO	lov10c	no	no	NA	NA
KO	lov10c	no	no	NA	NA
KO	lov10c	no	no	NA	NA
KO	lov10c	no	no	NA	NA
KO	lov10c	no	no	NA	NA
KO	lov10c	no	no	NA	NA
KO	lov10c	run	yes	NA	NA
KO	lov10c	run	yes	NA	NA
KO	lov10c	run	yes	NA	NA
KO	lov10c	run	yes	NA	NA
KO	lov10c	tonic	yes	NA	NA
KO	lov10c	tonic	yes	NA	NA
